# Supplementary material
Source: publisher figshare collection journal article supplement (https://springernature.figshare.com/ndownloader/files/14097212)
Supplement: Supplementary file 1 [file 14097212]

## Sheet: PHYLO-HOST_graphs
Morris et al 2018. P. syringae host range
Fig.S1 Host range relative to phylogenetic context of strains of Pseudomonas syringae (upper figures) or ordered by rank of increasing host range and increasing number of pathogens per plant (lower figures) for each of the four independent inoculation tests. Phylogenetic trees are Neighbor-joining trees based on partial sequences of the cts (citrate synthase) gene, 413 bp.
			NJ trees, bootstrap, 100 rounds, p-distance					A-1998		45 strains																										B-2008
									Chinese cabbage	Barley	Wheat	Snap bean	Sorghum	Lettuce	Oats	Soybean	Cucumber	Corn	Pepper	Sunflower	Eggplant	Cantaloupe	Tomato	Sugar beet	Onion	Pea											Sunflower	Sorghum	Soybean	Barley	Corn	Snap bean	Cantaloupe	Sugar beet	Wheat	Cucumber	Lettuce	Tomato	Eggplant
								CC0001	0	0	1	0	0	0	1	0	0	0	0	0	1	1	1	1	0	1										CC1458	0	0	0	0	1	1	0	1	0	0	0	0	1
								CC0004	0	0	1	0	0	1	0	1	1	0	0	1	1	1	1	1	1	1										CC1543	0	0	0	0	0	0	0	0	1	0	0	0	0
								CC0009	0	1	0	1	0	0	0	1	1	1	0	1	1	1	1	1	1	1										CC0440	0	1	1	0	1	0	1	1	0	1	1	1	0
								CC0040	0	1	0	1	1	1	1	0	1	1	1	1	1	1	1	1	1	1										CC0457	0	0	0	0	0	0	0	0	0	1	0	0	1
								CC0043	0	0	0	0	0	0	0	0	0	0	0	0	0	0	1	0	0	1										DSM50252	0	0	0	0	0	0	0	0	0	0	1	0	0
								CC0062	1	0	1	1	1	1	1	1	1	1	1	1	1	1	1	1	1	1										DSM50255	0	0	0	0	0	0	0	0	0	0	0	0	0
								CC0084	0	0	0	1	1	1	0	1	1	1	1	1	1	1	1	1	1	1										MAFF301072 PT	0	0	0	0	0	0	0	0	0	0	0	1	0
								CC0085	0	0	1	0	0	0	1	1	0	0	0	0	0	0	0	1	0	1										HRI 1704B	0	0	0	0	0	0	0	0	0	0	0	0	0
								CC0103	0	0	1	0	1	0	1	0	1	1	1	1	0	1	1	0	1	1										Cit7	0	1	0	0	0	0	0	0	0	0	0	0	0
								CC0111	0	0	0	0	0	0	0	1	0	1	1	1	0	1	0	0	1	1										USA0011	1	0	1	1	1	1	1	1	1	1	1	1	1
								CC0114	0	0	0	0	0	0	1	0	0	0	0	0	0	0	0	0	1	1										CC0094	1	1	1	1	1	1	1	1	1	1	1	1	1
								CC0125	1	1	0	1	1	1	0	1	1	1	1	1	1	1	1	1	1	1										CC0393	0	0	1	1	1	1	1	1	1	1	1	1	0
								CC0164	0	0	0	0	0	0	0	0	0	0	0	1	1	1	1	1	1	0										CC1498	1	0	1	1	1	1	1	1	1	1	1	1	1
																																				MAFF302273 PT	0	0	0	0	0	0	0	0	0	1	1	1	1
								CFBP1392	0	0	0	0	0	0	1	0	0	0	1	0	1	1	1	1	1	1										B728a	1	0	0	0	0	1	1	0	1	1	1	1	1
								CC0023	0	0	0	0	0	0	0	0	0	0	0	0	1	0	0	1	1	1										UB0303	0	1	1	0	0	0	1	0	1	0	1	1	1
								CC0024	0	0	0	0	0	0	0	0	0	0	0	0	0	0	0	0	0	0										0893_23	0	0	0	0	0	0	0	0	0	0	0	0	1
								CFBP1617	0	0	1	0	1	1	0	1	1	0	0	0	0	1	1	1	1	0										MAFF301315	0	0	0	0	0	0	0	0	0	0	0	0	0
								CFBP1788	0	0	0	0	0	0	0	0	0	1	0	0	0	0	1	0	0	1										11528	0	0	0	1	0	1	1	1	0	1	0	1	1
								CFBP1906	0	0	1	1	1	1	1	1	1	1	1	1	1	1	1	1	1	1										R4a	0	0	0	0	0	0	0	0	0	0	0	0	0
								CFBP2471	0	0	0	0	0	0	0	1	0	0	0	0	0	0	0	1	1	1										MAFF301020	0	0	0	0	0	0	0	0	0	0	0	0	0
								CFBP2507	0	0	0	0	0	0	0	0	0	1	0	0	1	0	0	1	0	1										1448A	0	0	0	0	0	0	0	0	0	0	0	0	0
								ICMP3390	0	1	0	1	1	0	0	1	1	1	0	1	0	1	1	1	1	1										1644R	0	0	0	0	0	0	0	0	0	0	0	0	0
								ICMP7501	0	0	0	0	0	0	0	0	0	0	0	0	0	0	0	0	0	0										CFBP3646	0	0	0	0	0	0	0	0	0	0	0	0	0
								CC0070	1	0	1	1	1	1	1	1	1	1	0	1	1	1	1	1	1	1										CC1557	0	1	0	0	0	0	0	1	0	0	0	0	0
								CFBP2213	0	0	0	0	1	0	0	0	0	1	0	0	0	1	0	1	1	0										CC1466	0	0	0	0	1	0	0	1	0	0	1	0	0
								CC0074	0	0	0	0	1	0	1	1	1	1	0	1	0	1	0	1	1	1										CC1583	0	0	0	0	0	1	1	1	1	1	0	1	1
								CFBP1622	0	0	0	0	0	0	1	0	0	0	0	0	0	0	0	0	1	1										ES4326	0	0	0	0	0	0	0	0	0	0	0	0	0
								CFBP2256	0	0	0	0	1	0	0	0	0	1	0	0	0	0	1	0	1	1										M4	0	0	0	0	0	0	0	0	0	0	0	0	0
								CFBP2896	0	0	1	0	1	0	1	0	0	0	1	0	1	0	0	1	1	1										CC1513	0	0	0	1	0	0	0	0	0	0	0	0	0
								CC0002	0	0	0	0	0	0	0	0	0	1	0	0	0	0	0	0	0	0										1_6	1	1	0	1	1	1	1	1	1	1	1	1	1
								CFBP2258	0	0	0	0	0	0	0	0	0	0	0	0	0	0	0	0	0	1										CC1629	0	0	0	0	0	0	0	1	1	0	0	0	0
								5B530	0	0	0	0	0	0	0	0	0	0	1	0	1	0	0	0	1	1										MAFF302278 PT	0	0	0	0	0	0	0	0	0	1	1	1	1
								B728a	0	0	0	0	0	0	0	0	0	0	1	0	1	0	0	0	1	1										KN10	0	0	1	0	0	0	0	0	1	0	1	0	1
								CC0145	0	1	0	1	1	1	1	0	0	1	1	1	1	1	1	1	1	1										DC3000	0	0	0	0	0	0	0	0	1	0	0	1	1
								9B1	0	0	0	1	0	1	1	0	1	0	1	1	1	1	1	1	1	1										CC1630	0	0	0	0	0	0	0	0	0	0	0	0	0
								CC0066	0	0	0	0	0	0	0	0	1	0	1	1	0	1	1	0	1	1										MAFF302091 PT	0	0	0	0	0	0	0	0	0	0	0	0	0
								CC0073	0	0	0	0	0	1	0	0	1	0	1	1	1	1	1	1	1	1										MAFF302280 PT	0	0	0	0	0	0	0	0	0	0	0	0	0
								CC0088	0	0	0	1	0	1	0	1	1	1	1	1	1	1	1	1	1	1										CC1416	0	0	0	0	0	0	0	0	0	0	0	0	0
								CC0094	0	0	0	1	0	1	1	0	1	1	1	1	1	1	1	1	1	1										CC1544	0	0	0	0	0	0	0	0	0	0	0	0	0
								CC0101	0	0	0	1	0	0	0	1	0	0	1	1	1	1	1	0	1	1										CC1559	0	0	0	0	0	0	0	0	0	0	0	0	0
								CC0159	0	0	0	0	0	1	0	1	1	0	1	1	1	1	1	1	1	1										USA0007	0	0	0	0	0	0	0	0	0	0	0	0	0
								CFBP70	0	0	0	0	0	0	0	0	0	0	0	0	0	0	0	0	0	1										CC1417	0	0	0	0	0	0	0	0	0	0	0	0	0
								CFBP2104	0	0	0	0	0	0	0	0	0	0	0	0	0	0	0	0	0	1										CC1524	0	0	0	0	0	0	0	0	0	0	0	0	0
								CFBP1634	0	0	0	0	0	0	0	0	0	0	0	0	0	0	0	0	1	0
								CFBP2341	0	0	0	0	0	0	0	0	0	0	0	0	0	0	0	0	0	1
							Nested/modular		Chinese cabbage	Barley	Wheat	Snap bean	Sorghum	Lettuce	Oats	Soybean	Cucumber	Corn	Pepper	Sunflower	Eggplant	Cantaloupe	Tomato	Sugar beet	Onion	Pea	total	fraction of plant spp									Sunflower	Sorghum	Soybean	Barley	Corn	Snap bean	Cantaloupe	Sugar beet	Wheat	Cucumber	Lettuce	Tomato	Eggplant
								ICMP7501	0	0	0	0	0	0	0	0	0	0	0	0	0	0	0	0	0	0	0	0								HRI 1704B	0	0	0	0	0	0	0	0	0	0	0	0	0
								CC0024	0	0	0	0	0	0	0	0	0	0	0	0	0	0	0	0	0	0	0	0								R4a	0	0	0	0	0	0	0	0	0	0	0	0	0
								CC0002	0	0	0	0	0	0	0	0	0	1	0	0	0	0	0	0	0	0	1	0.0555556								MAFF301020	0	0	0	0	0	0	0	0	0	0	0	0	0
								CFBP2258	0	0	0	0	0	0	0	0	0	0	0	0	0	0	0	0	0	1	1	0.0555556								1448A	0	0	0	0	0	0	0	0	0	0	0	0	0
								CFBP70	0	0	0	0	0	0	0	0	0	0	0	0	0	0	0	0	0	1	1	0.0555556								1664R	0	0	0	0	0	0	0	0	0	0	0	0	0
								CFBP2104	0	0	0	0	0	0	0	0	0	0	0	0	0	0	0	0	0	1	1	0.0555556								CFBP3646	0	0	0	0	0	0	0	0	0	0	0	0	0
								CFBP1634	0	0	0	0	0	0	0	0	0	0	0	0	0	0	0	0	1	0	1	0.0555556								MAFF302091 PT	0	0	0	0	0	0	0	0	0	0	0	0	0
								CFBP2341	0	0	0	0	0	0	0	0	0	0	0	0	0	0	0	0	0	1	1	0.0555556								MAFF302280 PT	0	0	0	0	0	0	0	0	0	0	0	0	0
								CC0043	0	0	0	0	0	0	0	0	0	0	0	0	0	0	1	0	0	1	2	0.111111								CC1416	0	0	0	0	0	0	0	0	0	0	0	0	0
								CFBP1788	0	0	0	0	0	0	0	0	0	1	0	0	0	0	1	0	0	1	3	0.166667								USA0007	0	0	0	0	0	0	0	0	0	0	0	0	0
								CC0114	0	0	0	0	0	0	1	0	0	0	0	0	0	0	0	0	1	1	3	0.166667								CC1417	0	0	0	0	0	0	0	0	0	0	0	0	0
								CFBP1622	0	0	0	0	0	0	1	0	0	0	0	0	0	0	0	0	1	1	3	0.166667								CC1524	0	0	0	0	0	0	0	0	0	0	0	0	0
								B728a	0	0	0	0	0	0	0	0	0	0	1	0	1	0	0	0	1	1	4	0.222222								MAFF301072 PT	0	0	0	0	0	0	0	0	0	0	0	1	0
								5B530	0	0	0	0	0	0	0	0	0	0	1	0	1	0	0	0	1	1	4	0.222222								Cit7	0	1	0	0	0	0	0	0	0	0	0	0	0
								CFBP2507	0	0	0	0	0	0	0	0	0	1	0	0	1	0	0	1	0	1	4	0.222222								0893_23	0	0	0	0	0	0	0	0	0	0	0	0	1
								CC0023	0	0	0	0	0	0	0	0	0	0	0	0	1	0	0	1	1	1	4	0.222222								MAFF301315	0	0	0	0	0	0	0	0	0	0	0	0	0
								CFBP2471	0	0	0	0	0	0	0	1	0	0	0	0	0	0	0	1	1	1	4	0.222222								ES4326	0	0	0	0	0	0	0	0	0	0	0	0	0
								CFBP2213	0	0	0	0	1	0	0	0	0	1	0	0	0	1	0	1	1	0	5	0.277778								M4	0	0	0	0	0	0	0	0	0	0	0	0	0
								CC0085	0	0	1	0	0	0	1	1	0	0	0	0	0	0	0	1	0	1	5	0.277778								CC1630	0	0	0	0	0	0	0	0	0	0	0	0	0
								CFBP2256	0	0	0	0	1	0	0	0	0	1	0	0	0	0	1	0	1	1	5	0.277778								CC1544	0	0	0	0	0	0	0	0	0	0	0	0	0
								CC0164	0	0	0	0	0	0	0	0	0	0	0	1	1	1	1	1	1	0	6	0.333333								CC1559	0	0	0	0	0	0	0	0	0	0	0	0	0
								CC0001	0	0	1	0	0	0	1	0	0	0	0	0	1	1	1	1	0	1	7	0.388889								CC1543	0	0	0	0	0	0	0	0	1	0	0	0	0
								CC0111	0	0	0	0	0	0	0	1	0	1	1	1	0	1	0	0	1	1	7	0.388889								DSM50252	0	0	0	0	0	0	0	0	0	0	1	0	0
								CC0066	0	0	0	0	0	0	0	0	1	0	1	1	0	1	1	0	1	1	7	0.388889								DSM50255	0	0	0	0	0	0	0	0	0	0	0	0	0
								CFBP1392	0	0	0	0	0	0	1	0	0	0	1	0	1	1	1	1	1	1	8	0.444444								CC15113	0	0	0	1	0	0	0	0	0	0	0	0	0
								CFBP2896	0	0	1	0	1	0	1	0	0	0	1	0	1	0	0	1	1	1	8	0.444444								CC0457	0	0	0	0	0	0	0	0	0	1	0	0	1
								CFBP1617	0	0	1	0	1	1	0	1	1	0	0	0	0	1	1	1	1	0	9	0.5								CC1466	0	0	0	0	1	0	0	1	0	0	1	0	0
								CC0101	0	0	0	1	0	0	0	1	0	0	1	1	1	1	1	0	1	1	9	0.5								CC1629	0	0	0	0	0	0	0	1	1	0	0	0	0
								CC0074	0	0	0	0	1	0	1	1	1	1	0	1	0	1	0	1	1	1	10	0.555556								CC1557	0	1	0	0	0	0	0	1	0	0	0	0	0
								CC0073	0	0	0	0	0	1	0	0	1	0	1	1	1	1	1	1	1	1	10	0.555556								DC3000	0	0	0	0	0	0	0	0	1	0	0	1	1
								CC0004	0	0	1	0	0	1	0	1	1	0	0	1	1	1	1	1	1	1	11	0.611111								CC1458	0	0	0	0	1	1	0	1	0	0	0	0	1
								CC0103	0	0	1	0	1	0	1	0	1	1	1	1	0	1	1	0	1	1	11	0.611111								MAFF302273 PT	0	0	0	0	0	0	0	0	0	1	1	1	1
								CC0159	0	0	0	0	0	1	0	1	1	0	1	1	1	1	1	1	1	1	11	0.611111								MAFF302278 PT	0	0	0	0	0	0	0	0	0	1	1	1	1
								CC0009	0	1	0	1	0	0	0	1	1	1	0	1	1	1	1	1	1	1	12	0.666667								KN10	0	0	1	0	0	0	0	0	1	0	1	0	1
								ICMP3390	0	1	0	1	1	0	0	1	1	1	0	1	0	1	1	1	1	1	12	0.666667								UB0303	0	1	1	0	0	0	1	0	1	0	1	1	1
								9B1	0	0	0	1	0	1	1	0	1	0	1	1	1	1	1	1	1	1	12	0.666667								11528	0	0	0	1	0	1	1	1	0	1	0	1	1
								CC0088	0	0	0	1	0	1	0	1	1	1	1	1	1	1	1	1	1	1	13	0.722222								CC1583	0	0	0	0	0	1	1	1	1	1	0	1	1
								CC0094	0	0	0	1	0	1	1	0	1	1	1	1	1	1	1	1	1	1	13	0.722222								CC0440	0	1	1	0	1	0	1	1	0	1	1	1	0
								CC0084	0	0	0	1	1	1	0	1	1	1	1	1	1	1	1	1	1	1	14	0.777778								B728a	1	0	0	0	0	1	1	0	1	1	1	1	1
								CC145	0	1	0	1	1	1	1	0	0	1	1	1	1	1	1	1	1	1	14	0.777778								CC0393	0	0	1	1	1	1	1	1	1	1	1	1	0
								CC0040	0	1	0	1	1	1	1	0	1	1	1	1	1	1	1	1	1	1	15	0.833333								USA0011	1	0	1	1	1	1	1	1	1	1	1	1	1
								CC0125	1	1	0	1	1	1	0	1	1	1	1	1	1	1	1	1	1	1	16	0.888889								CC1498	1	0	1	1	1	1	1	1	1	1	1	1	1
								CFBP1906	0	0	1	1	1	1	1	1	1	1	1	1	1	1	1	1	1	1	16	0.888889								1_6	1	1	0	1	1	1	1	1	1	1	1	1	1
								CC0070	1	0	1	1	1	1	1	1	1	1	0	1	1	1	1	1	1	1	16	0.888889								CC0094	1	1	1	1	1	1	1	1	1	1	1	1	1
								CC0062	1	0	1	1	1	1	1	1	1	1	1	1	1	1	1	1	1	1	17	0.944444
[truncated: 49 more columns]
